# Supplementary material for: Multiomic Metabolic Enrichment Network Analysis Reveals Metabolite–Protein Physical Interaction Subnetworks Altered in Cancer
Source: PubMed Central journal article supplement (PMC8761777; doi:10.1016/j.mcpro.2021.100189), 2021-12-20

Figure S1

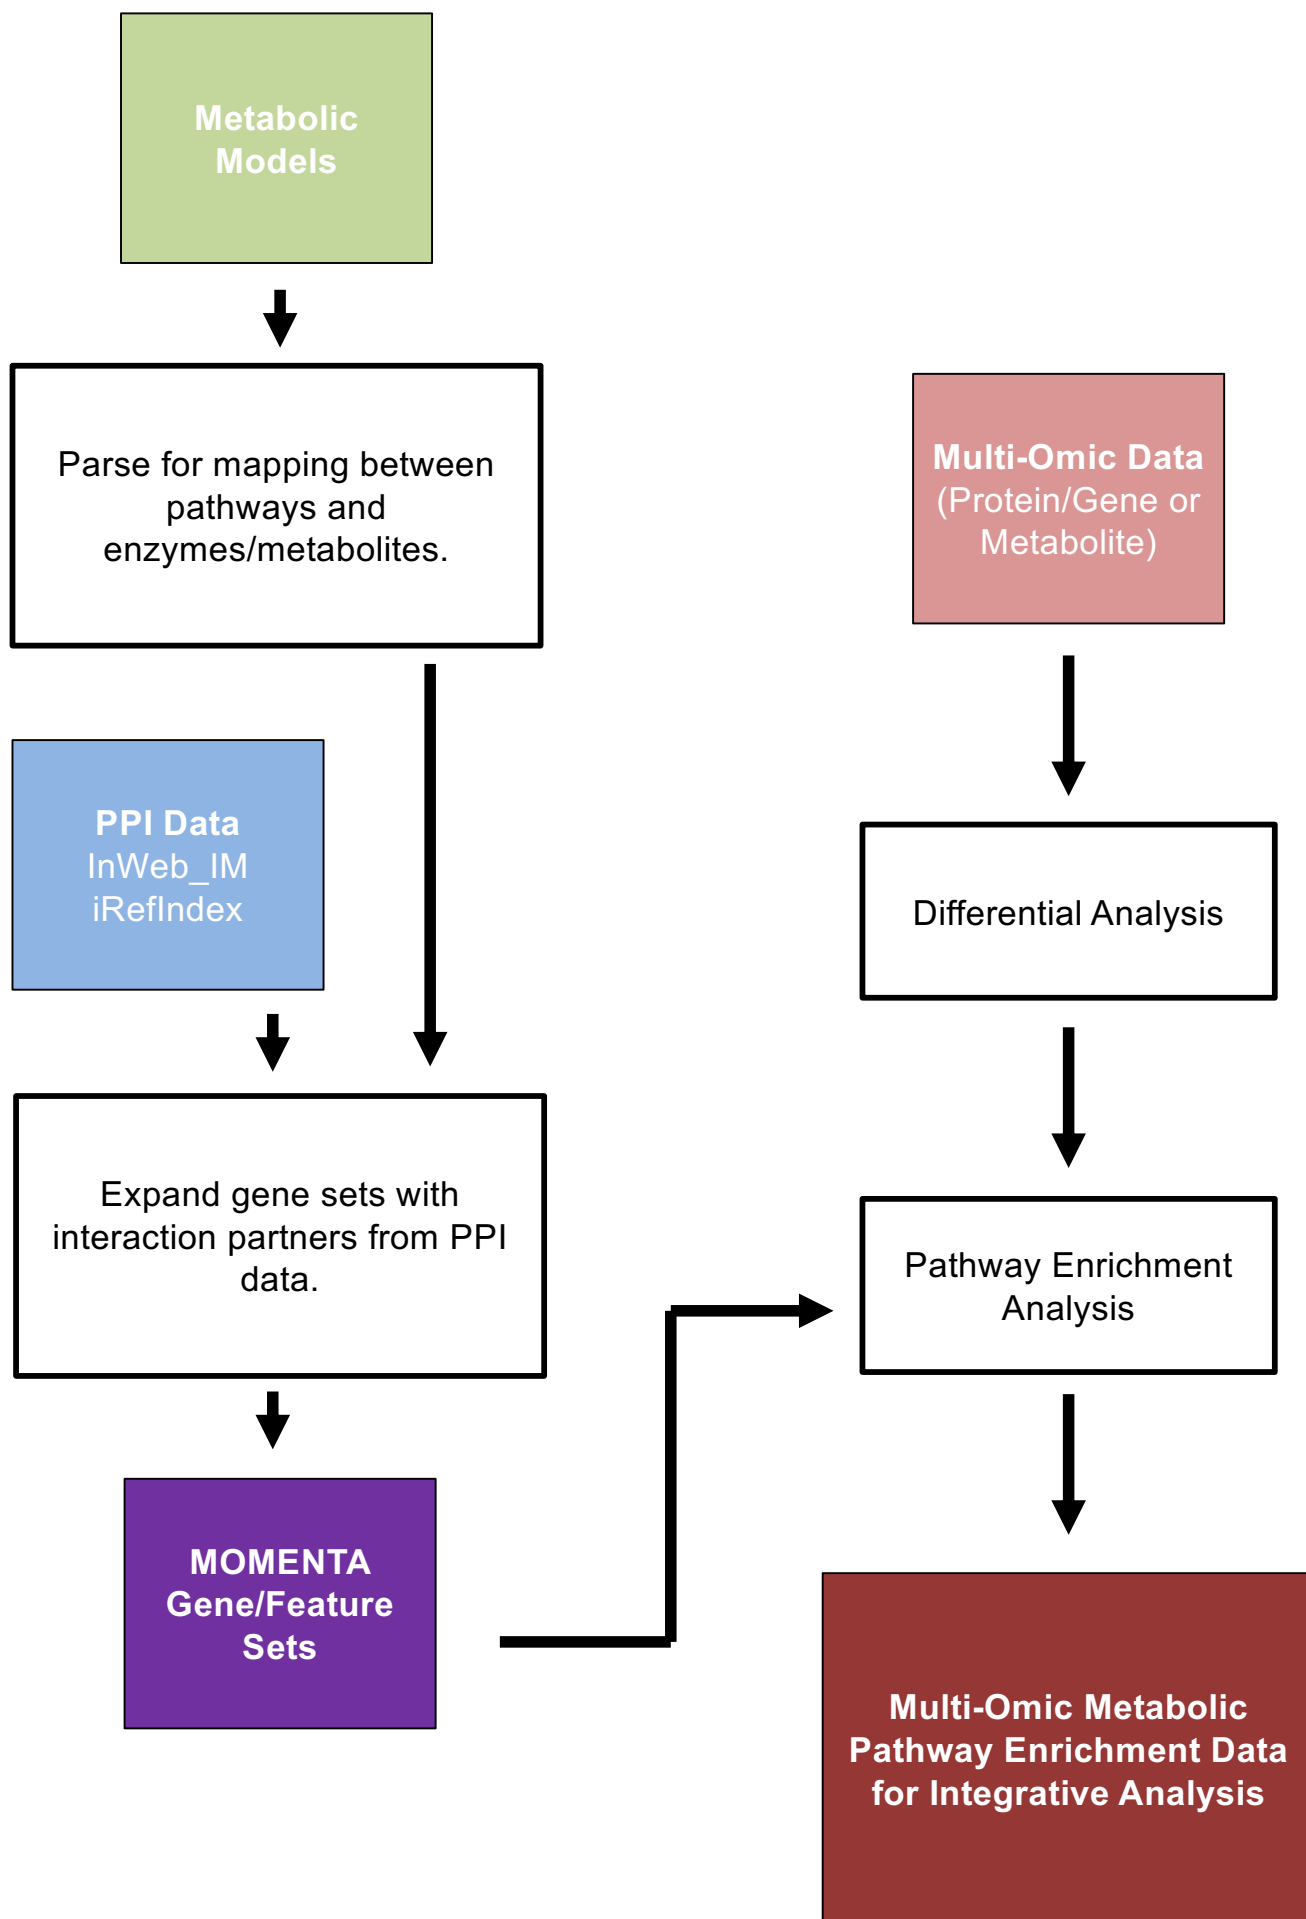

Figure S2

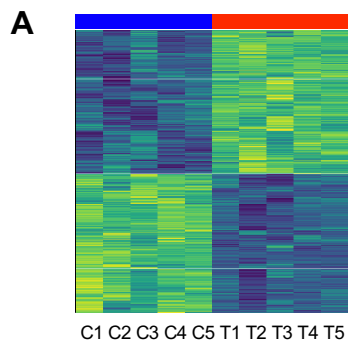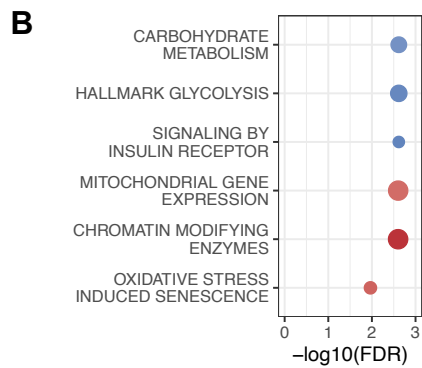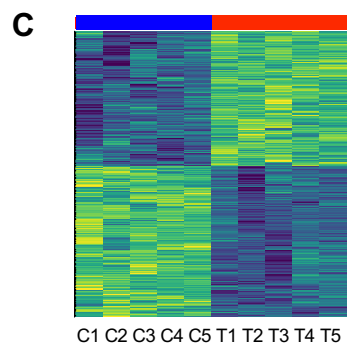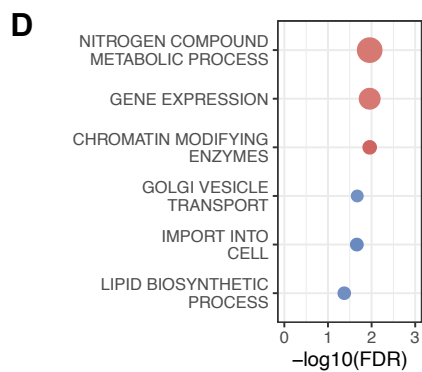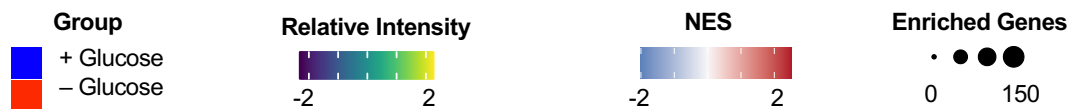

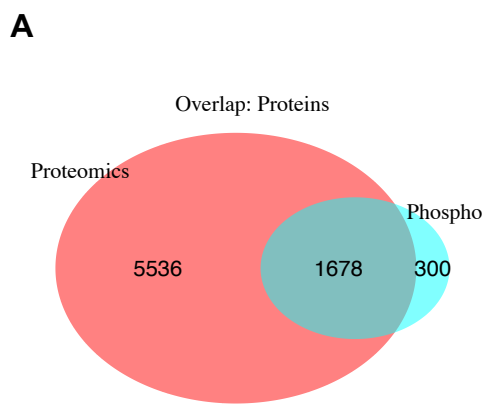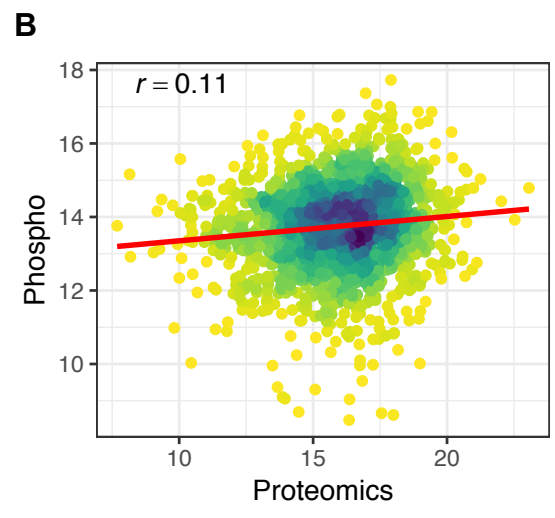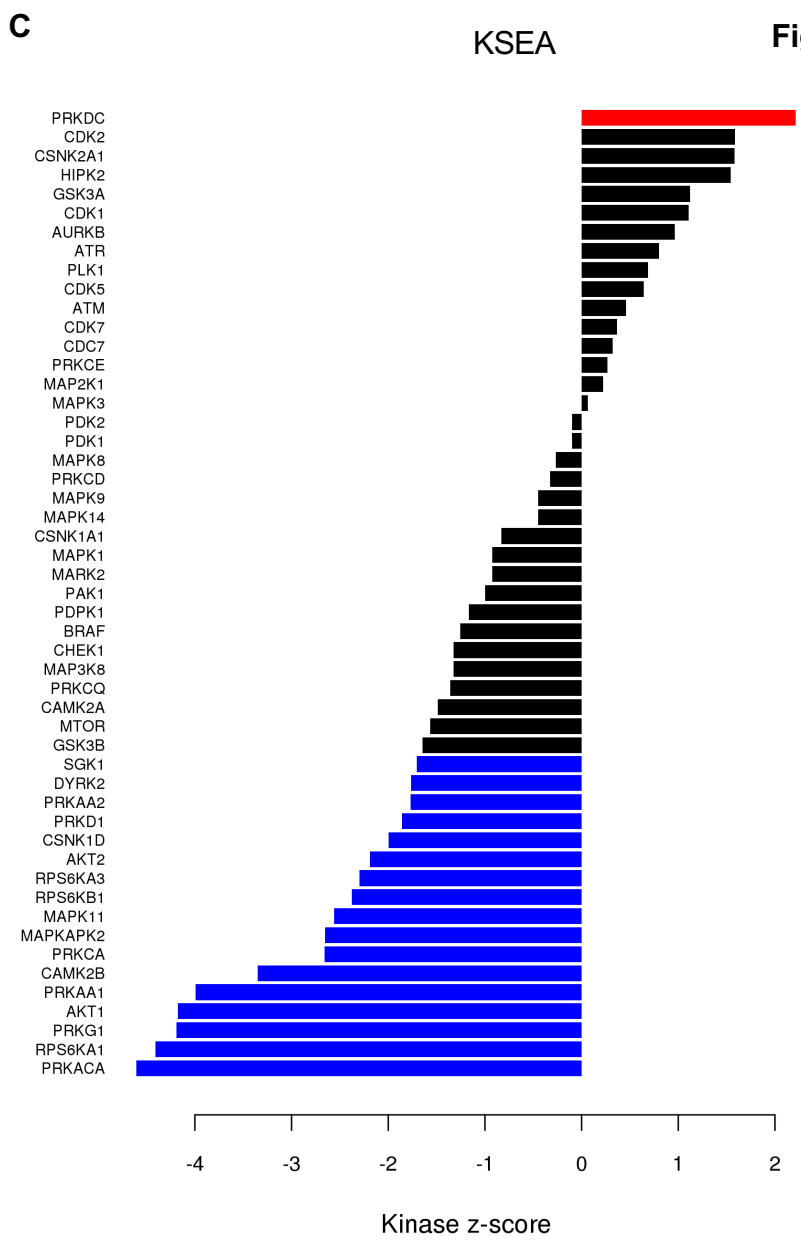

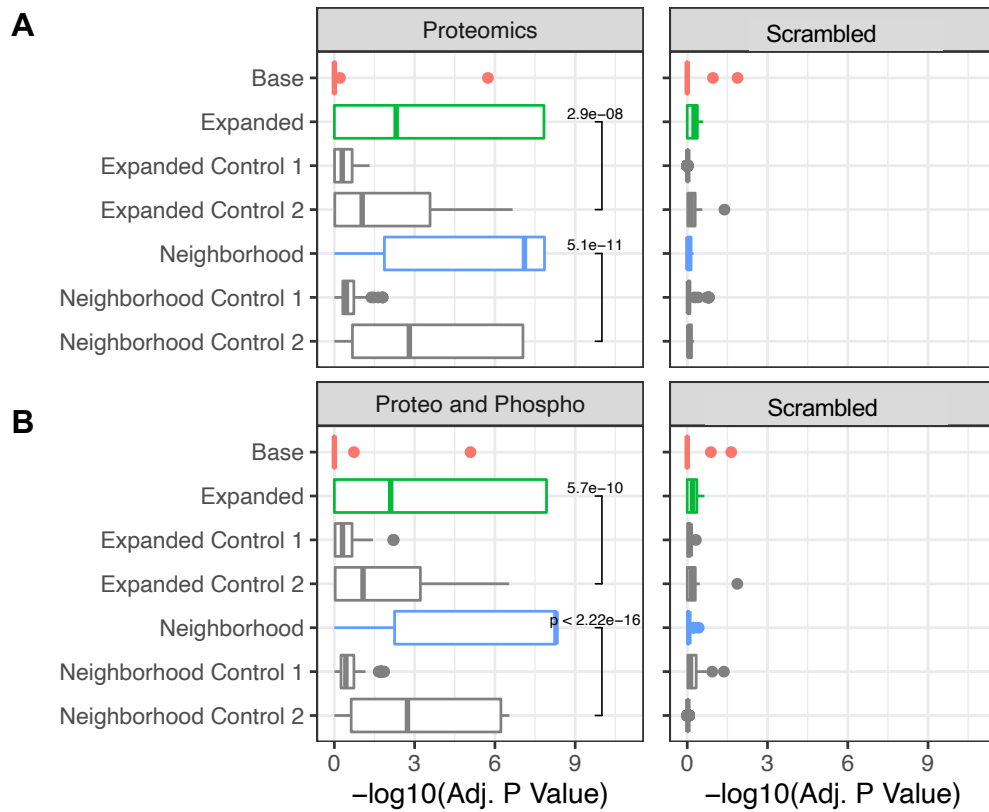

Figure S5

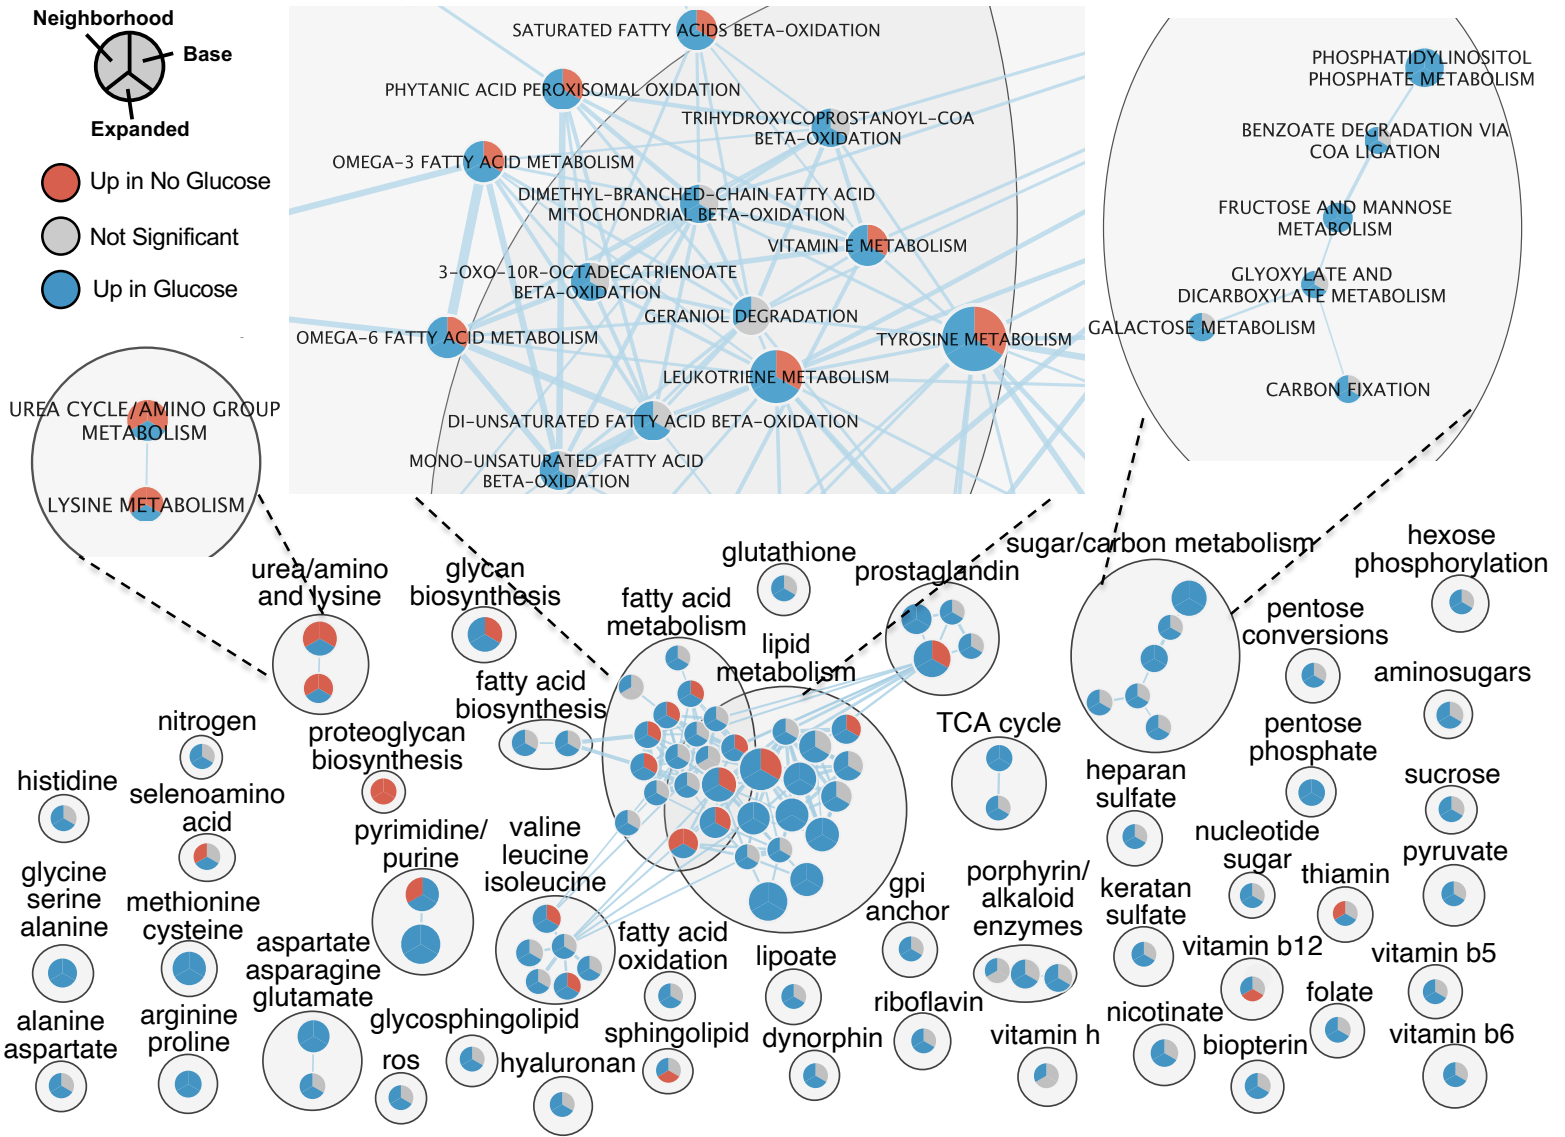

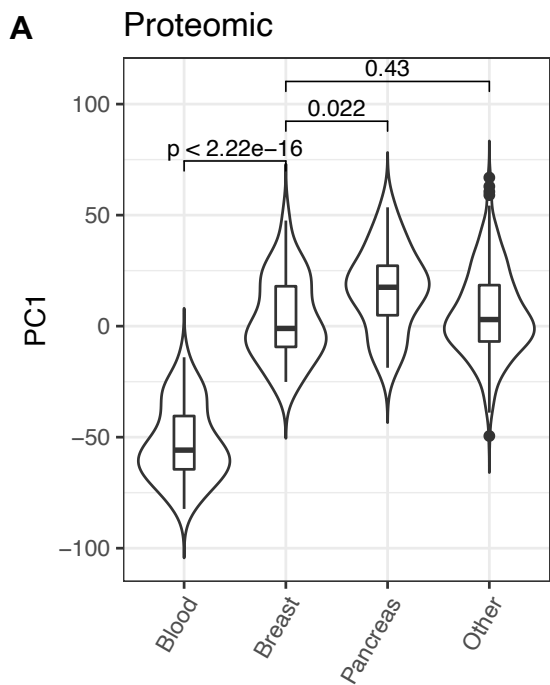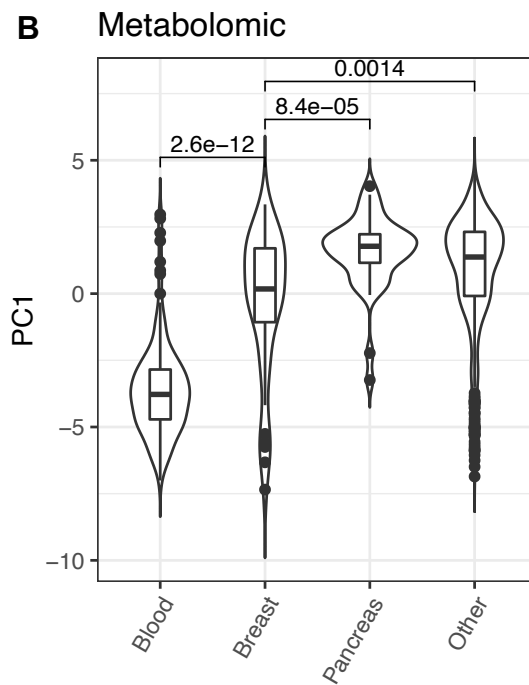

Figure S7

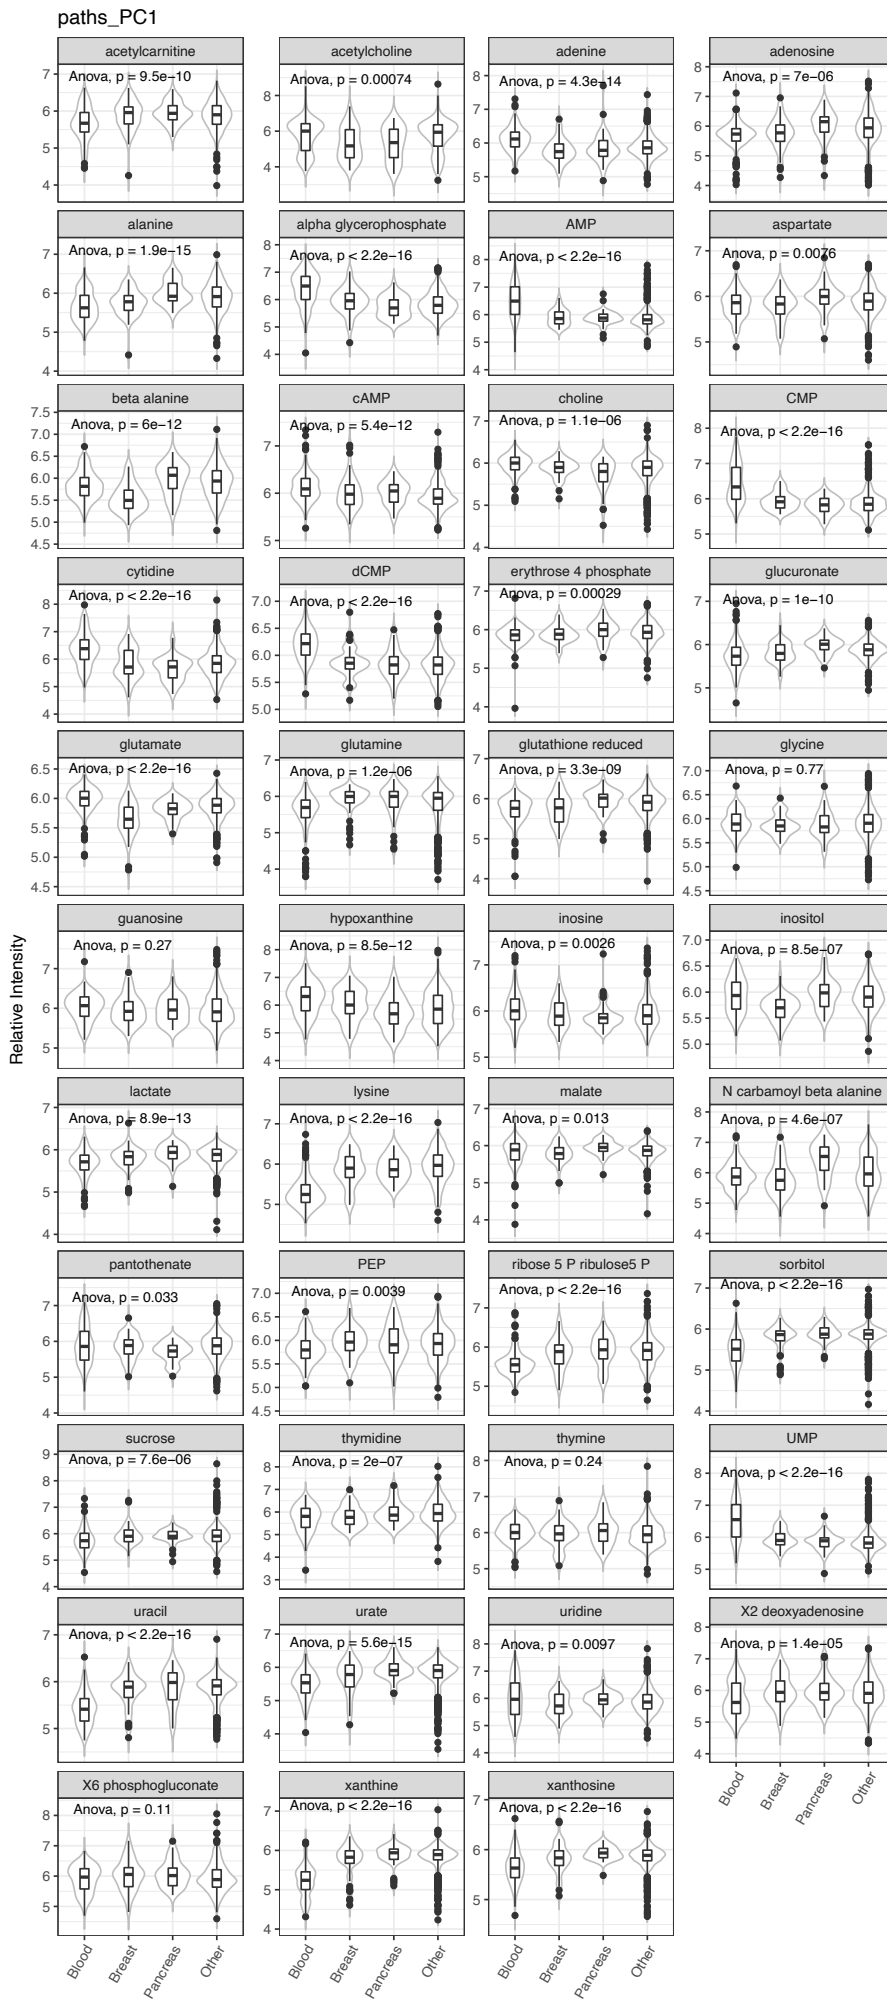

paths\_PC1

Figure S8

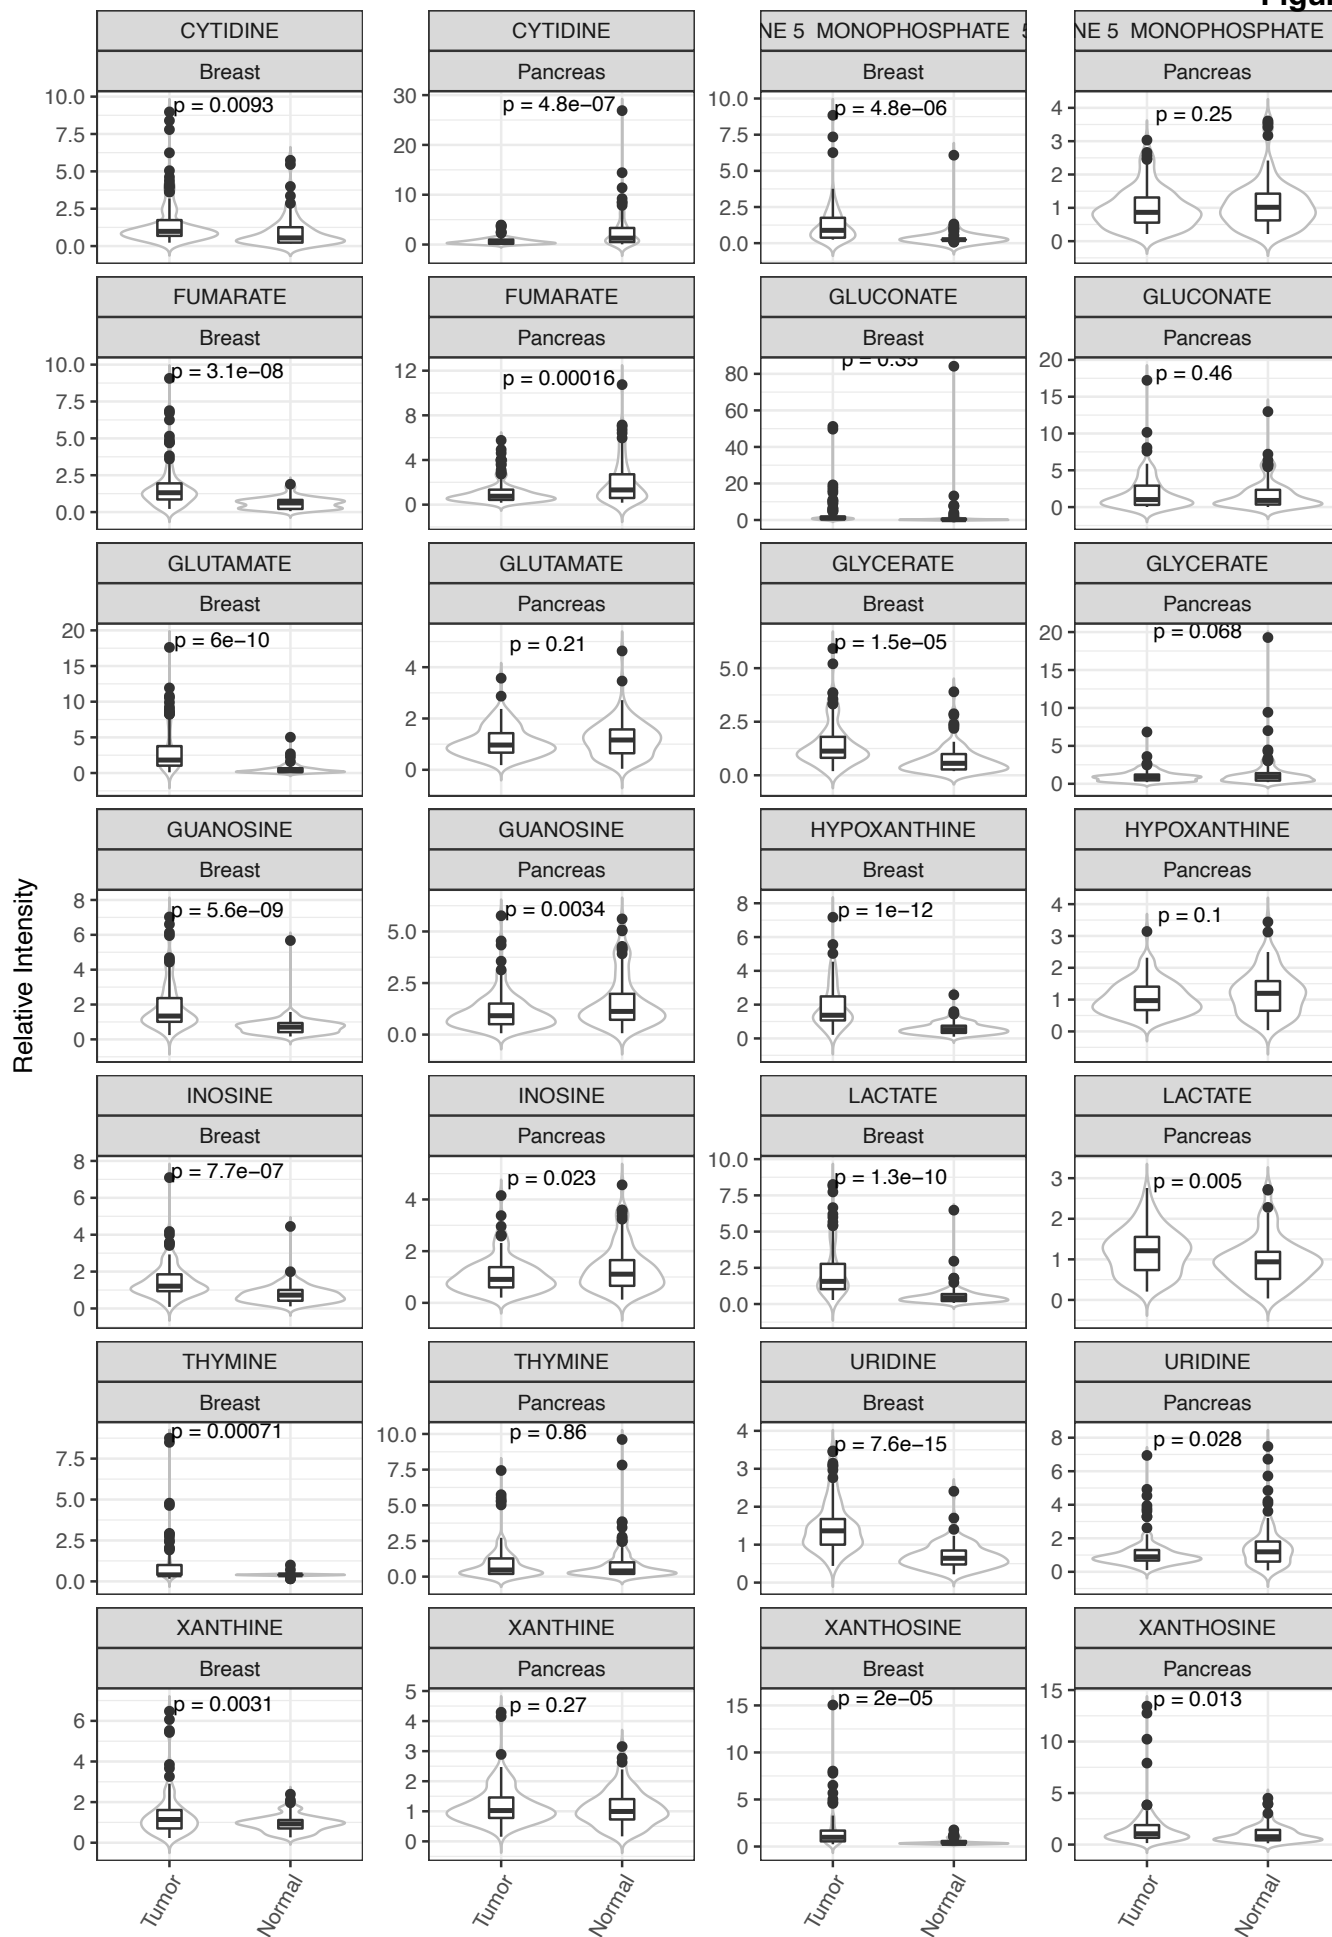



Figure S9

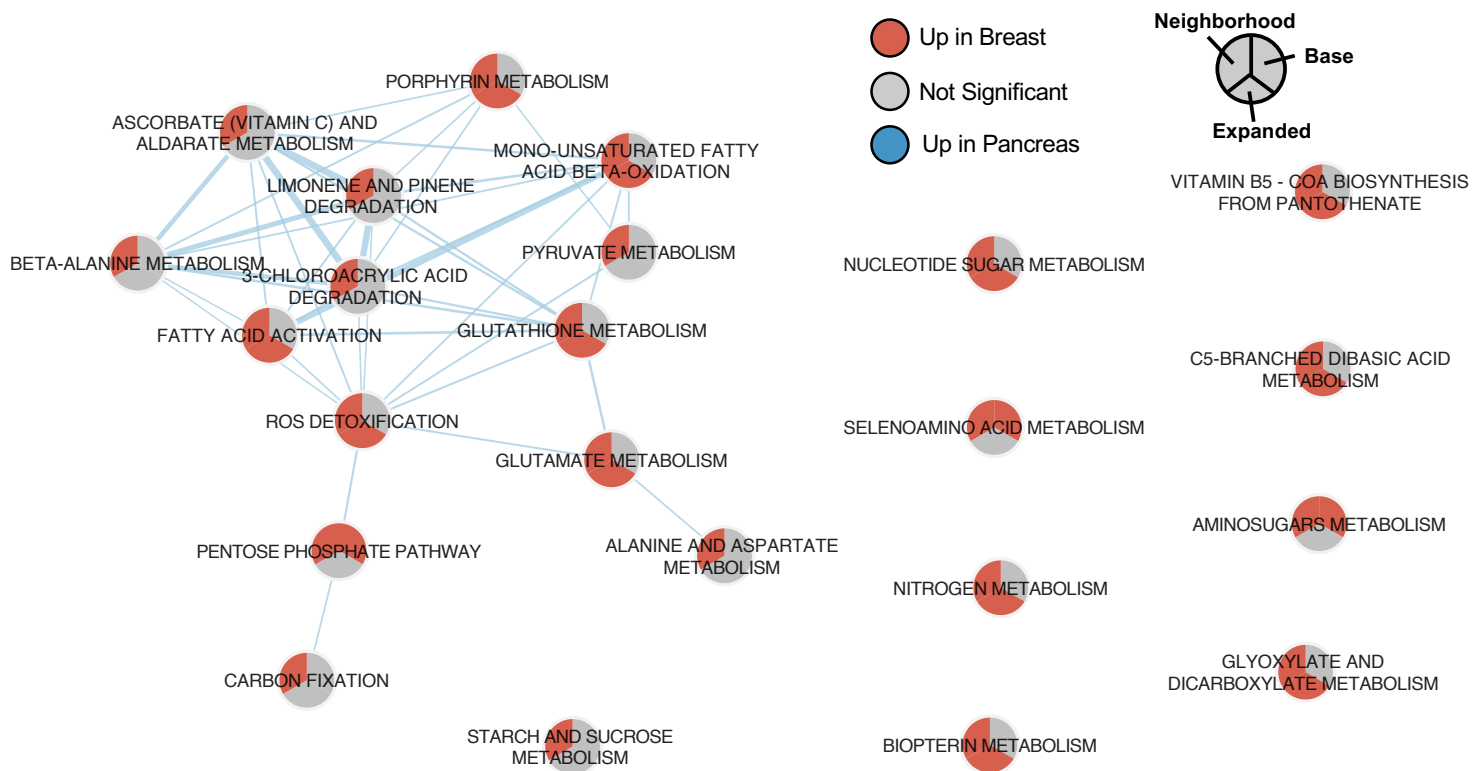

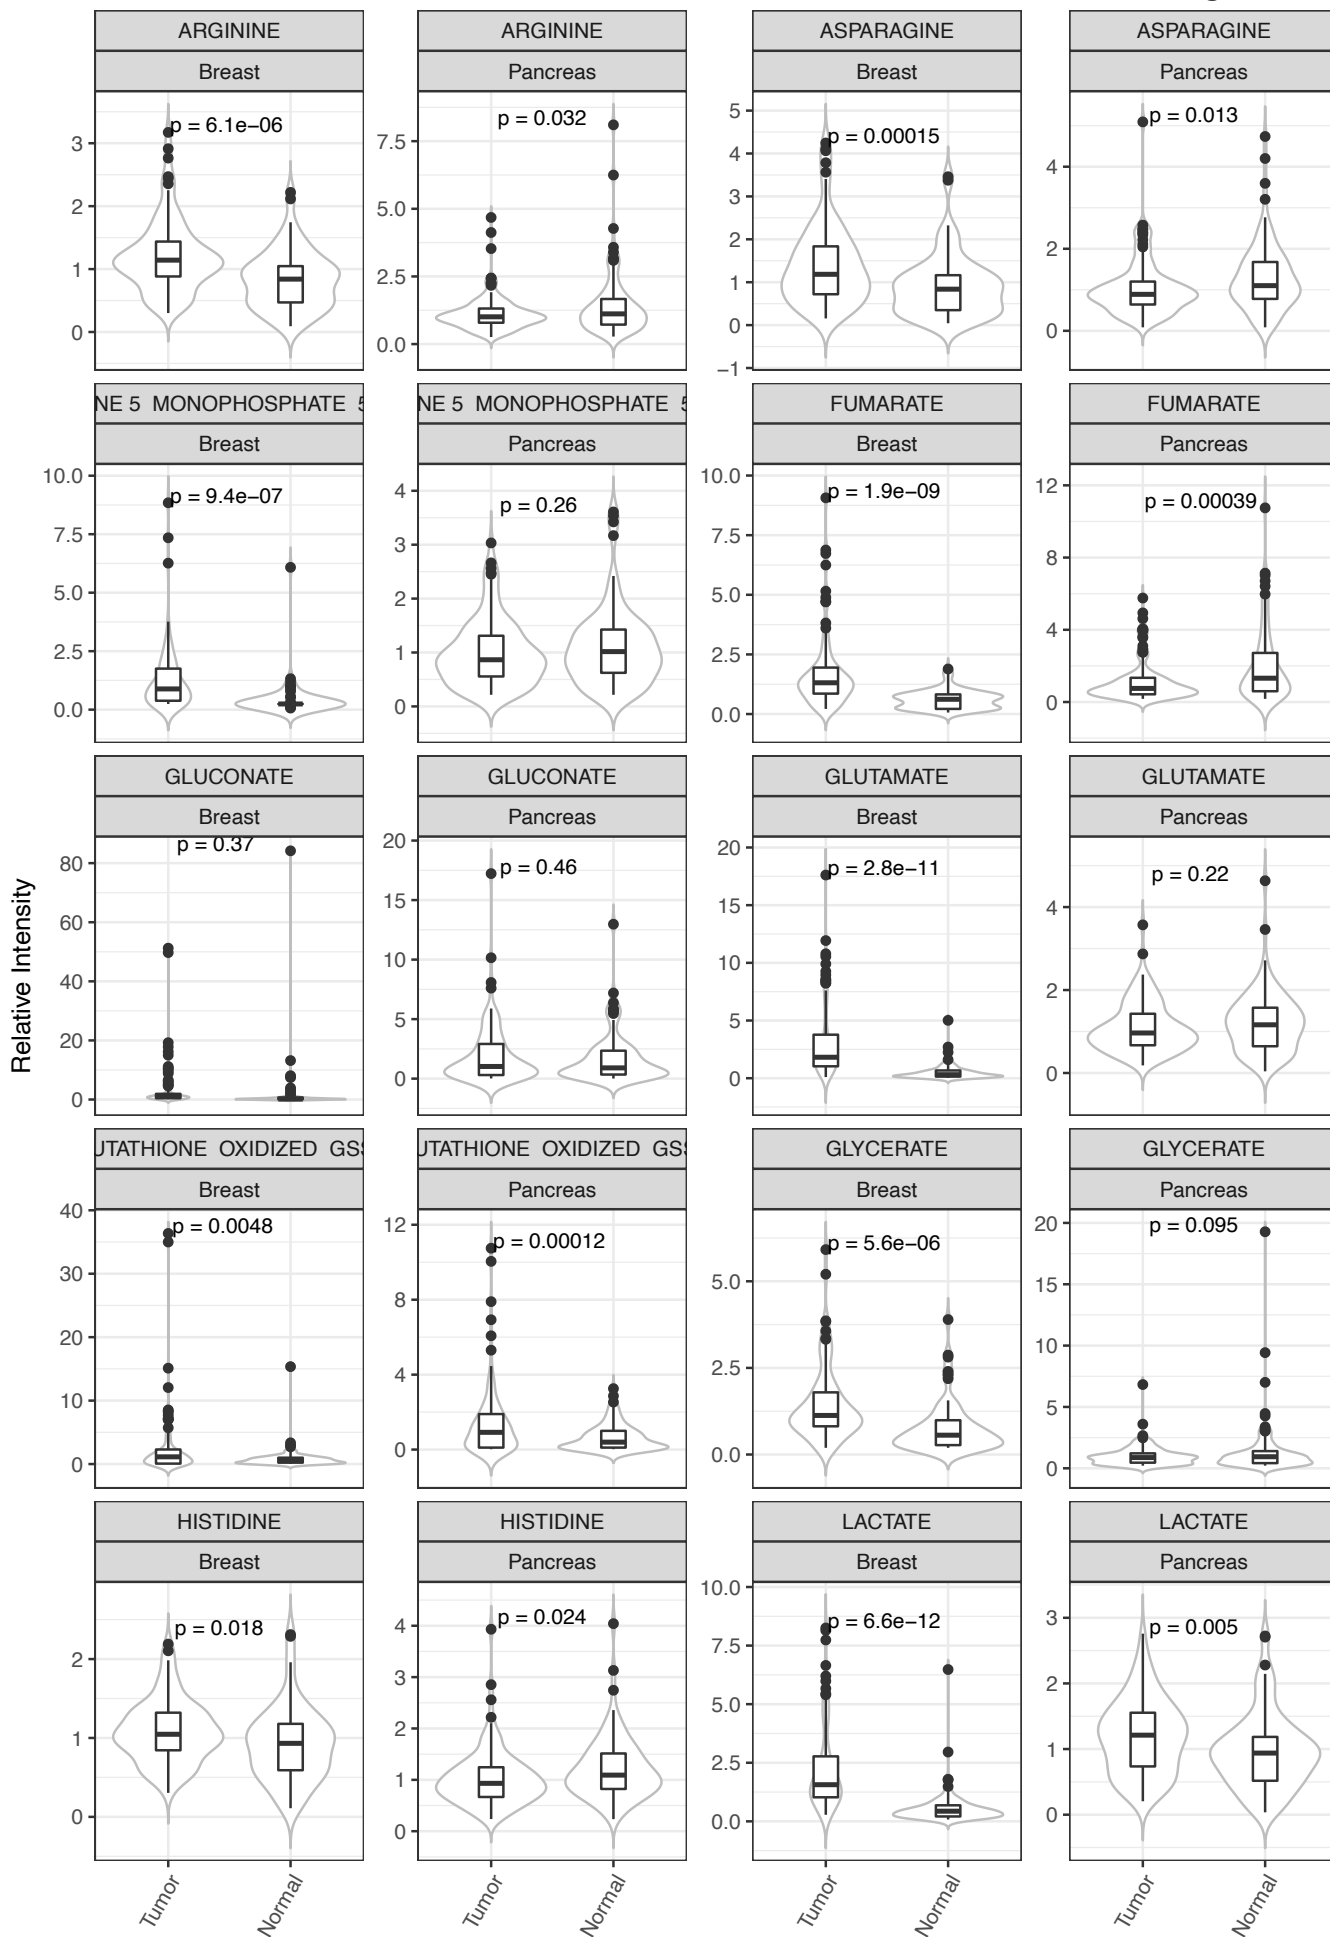

Pan Cancer Metabolism Data  
Lysine and Urea Cycle/Amino Group Pathway Metabolites

Figure S11

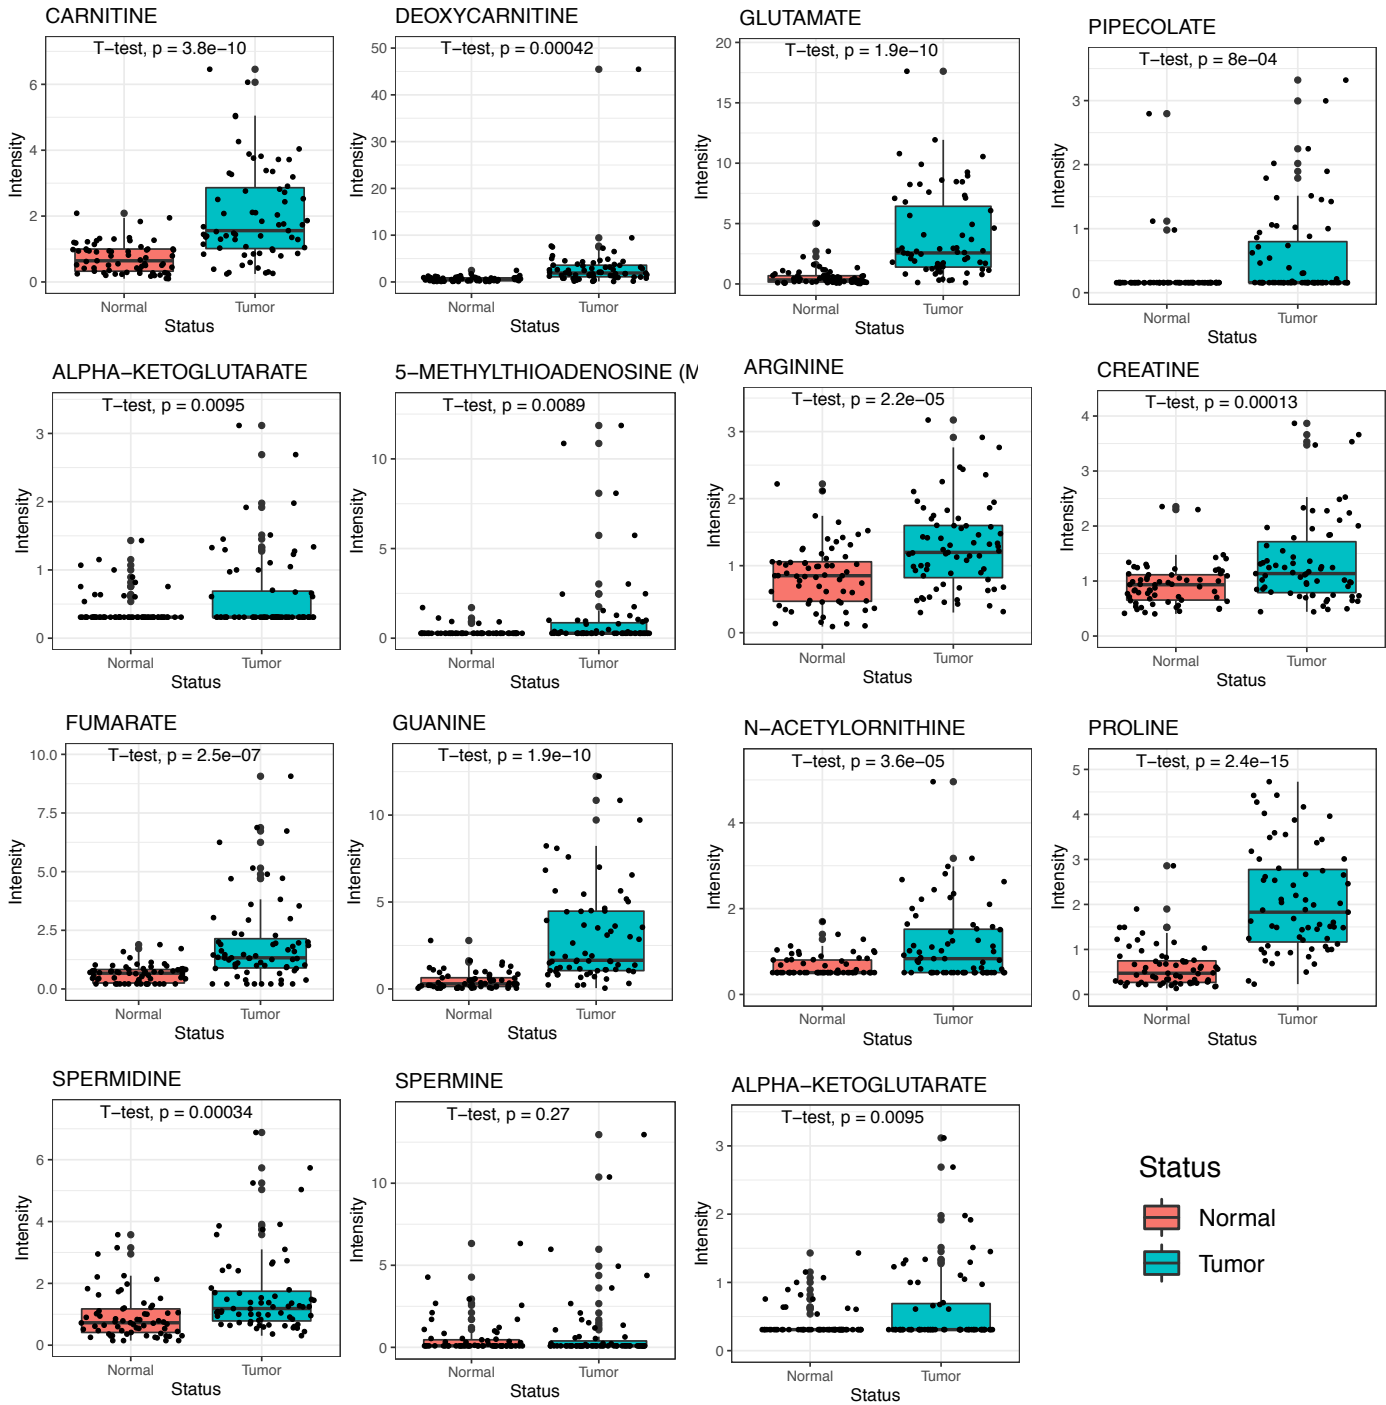

# Pan Cancer Metabolism Data

## Lysine and Urea Cycle/Amino Group Pathway Metabolites

Figure S12

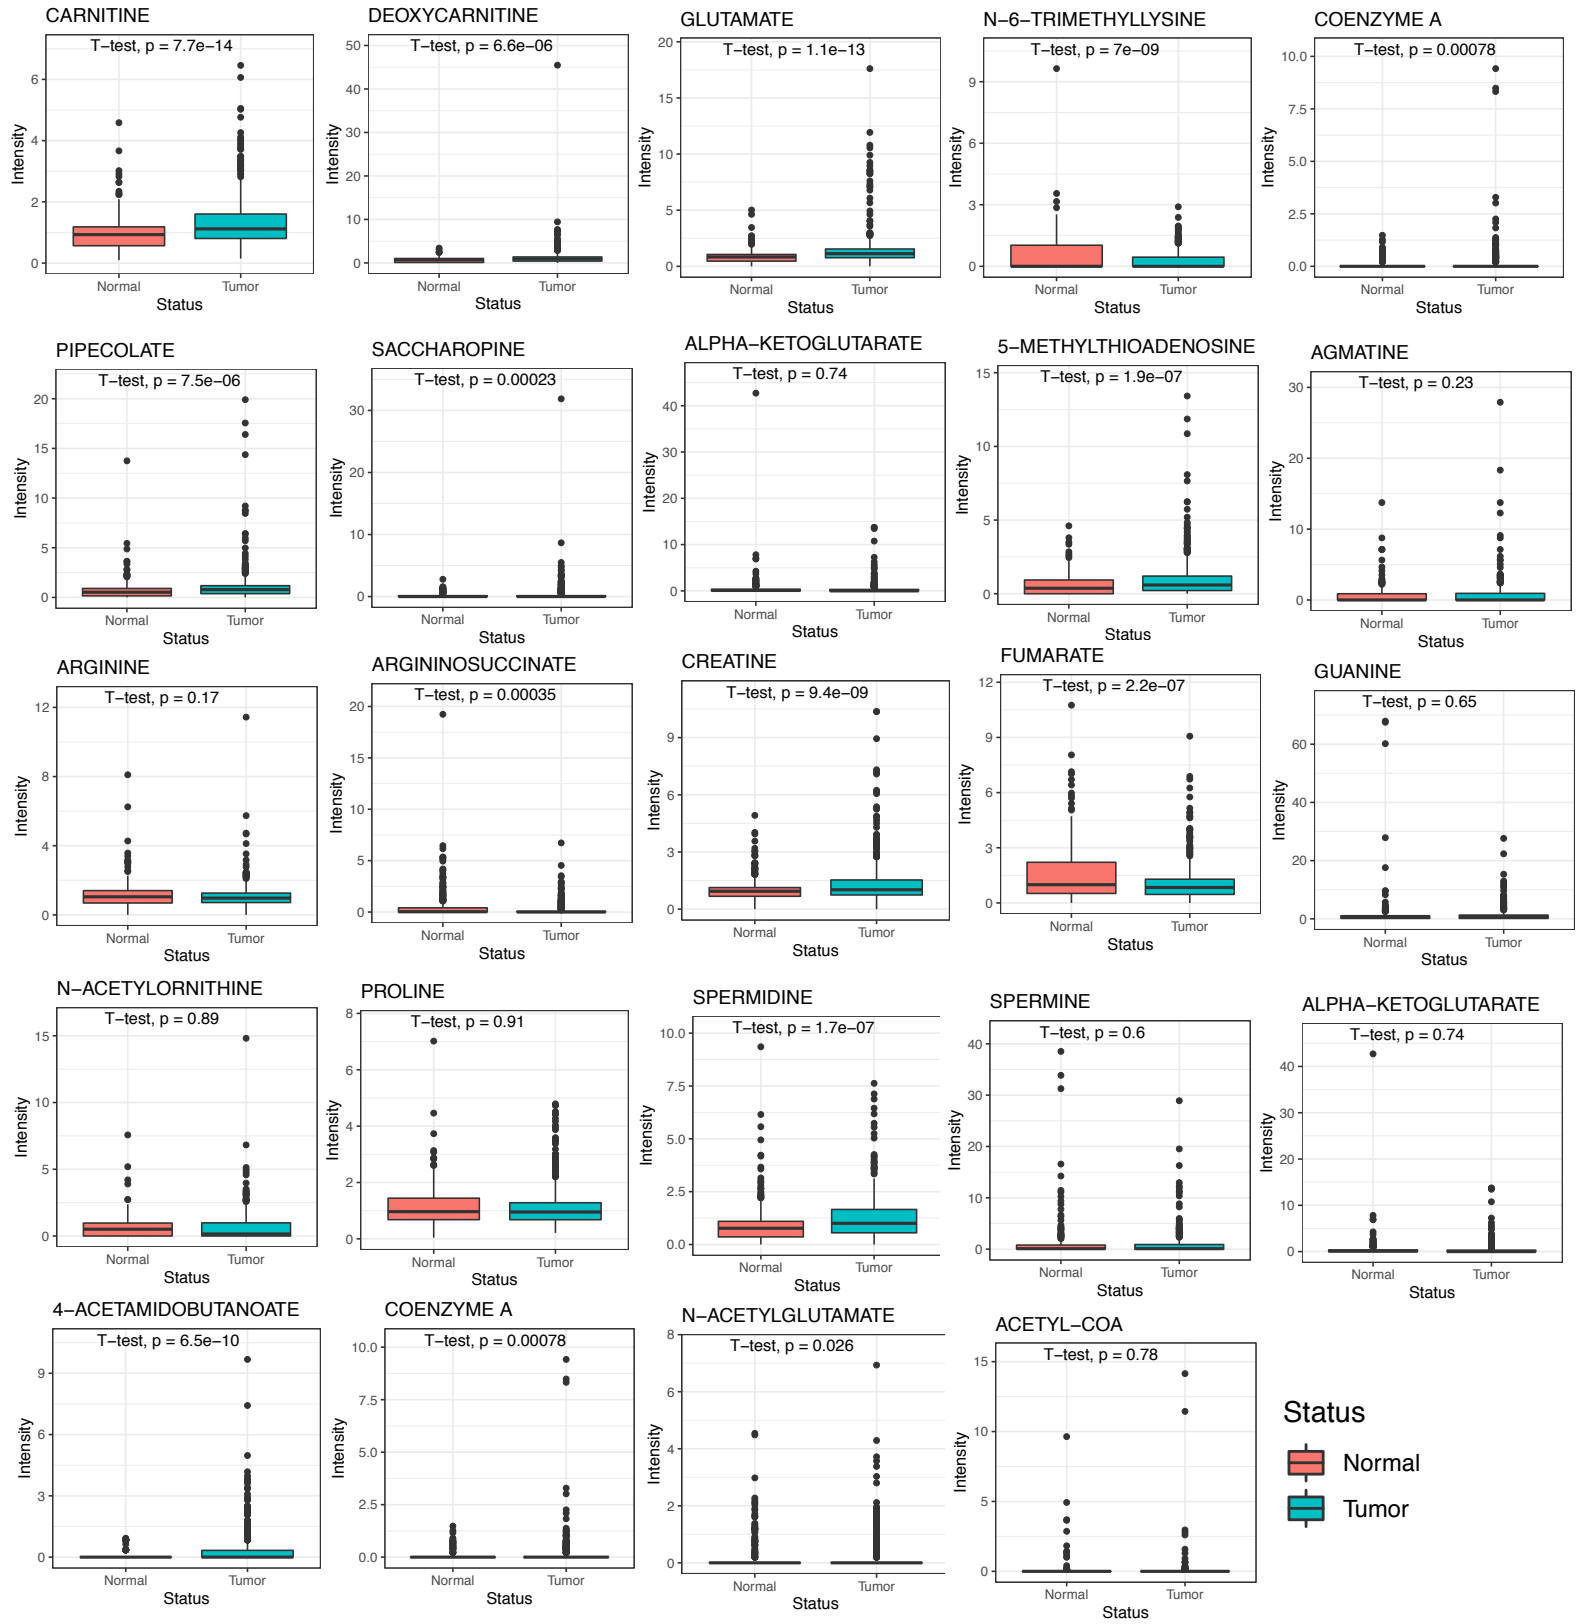

Supplement: mmc1.pdf [file mmc1.pdf]
